# Supplementary material for: Global analysis of gene expression dynamics within the marine microbial community during the VAHINE mesocosm experiment in the South West Pacific
Source: Copernicus journal article supplement (doi:10.5194/bg-2015-564), 2016-02-23
Supplement: Supplementary file 1 [file Supplementary Table S1.xlsx]

## Sheet: Diamond_top100_mean_transcripts
rank in M1	rank in Noumea lagoon	TranscriptID	RNA_type	product	taxon	comment	T02C1P1_RSEM	T04C1P1_RSEM	T06C1P1_RSEM	T08C1P1_RSEM	T10C1P1_RSEM	T12C1P1_RSEM	T14C1P1_RSEM	T16C1P1_RSEM	T18C1P1_RSEM	T20C1P1_RSEM	T23C1P1_RSEM	mean Noumea lagoon	T02M1P1_RSEM	T04M1P1_RSEM	T06M1P1_RSEM	T08M1P1_RSEM	T10M1P1_RSEM	T12M1P1_RSEM	T14M1P1_RSEM	T16M1P1_RSEM	T18M1P1_RSEM	T20M1P1_RSEM	T23M1P1_S22_RSEM	mean M1
2	1	TR3759645|c19_g1_i2	ncRNA	Yfr103	Synechococcus sp. CC9605	cluster 4	28942.1	57091.8	56858	49178.1	38215.9	13002.8	32305.4	5696.85	14131.1	15474.5	50403.6	32845.5	1506.54	1266.96	3748.83	6583.99	4901.91	14657.7	20817.3	12711.4	6964.23	3795.49	50224.6	11561.7
3	2	TR3720487|c6_g8_i1	ncRNA	Yfr103	Synechococcus sp. WH 8109	cluster 3	7570.59	9383.53	13513.8	13280.3	8371.04	2616.9	8457.44	1742.09	3010.1	5564.97	17746.9	8296.15	280.604	381.779	466.621	1410.64	849.467	2449.16	2878.22	2235.42	1897.96	731.508	23632.5	3383.08
5	3	TR3759723|c30_g1_i1	ncRNA	rnpB	Synechococcus	NA	6578.86	17263.4	7191.16	8544.13	6570.6	4926.66	5861.1	5813.34	3681.34	11884.2	4286.62	7509.22	2763.92	1574.87	3297.19	1444.05	4182.33	2438.74	1724.15	2006.83	5253.35	4752.57	5135.26	3143.02
8	4	TR3751554|c4_g1_i1	ncRNA	Yfr103	Synechococcus	cluster 1	7076.96	10893.7	13046	11547.7	4689.94	868.256	7357.79	372.804	3045.01	3387.11	10172.4	6587.05	412.011	246.447	583.515	459.865	589.918	1033.85	2624.33	494.868	667.737	542.663	10674.4	1666.32
4	5	TR3742308|c5_g3_i1	mRNA	photosystem I subunit VIII (PsaI)	Synechococcus sp. CC9605	dicistronic	6257.29	10487.7	6256.39	5369.45	5007.9	4213.4	4576.79	3678.61	2759	6100.74	7823.38	5684.6	2252.75	1253.75	3099.75	1569.43	2710.28	3078.6	2405.71	1775.07	4073.63	2872.98	10525.8	3237.98
4	5	TR3742308|c5_g3_i1	mRNA	putative photosystem I reaction center subunit XI (PsaL)	Synechococcus sp. CC9605	dicistronic	6257.29	10487.7	6256.39	5369.45	5007.9	4213.4	4576.79	3678.61	2759	6100.74	7823.38	5684.6	2252.75	1253.75	3099.75	1569.43	2710.28	3078.6	2405.71	1775.07	4073.63	2872.98	10525.8	3237.98
1	6	TR6945527|c0_g1_i1	NA	NA	NA	low complexity GGA, GGC repeats	419.834	83.94	77.713	74.066	1152.03	24473.1	750.051	21049.9	331.235	6.127	3.026	4401.91	719.37	1937.31	589.383	21445.2	957.336	24049.1	31479.5	51228.4	1143.86	21.833	3.928	12143.2
9	7	TR3710203|c1_g15_i1	not annotated	no proteins annotated	Candidatus Thalassoarchaea	doi:10.1038/ismej.2014.249	1287.93	1470.7	1462.03	2968.74	4259.81	2518.93	6833.35	1973.75	4088.6	4329.4	1211.13	2945.85	621.96	759.673	1418.67	935.107	3187.1	1009.13	3222.45	638.233	1710.36	671.08	700.668	1352.22
6	8	TR3355210|c0_g2_i1	NA	NA	NA	NA	745.978	330.627	551.106	346.524	4160.54	11184.3	1215.92	6668.89	2142.48	0	26.028	2488.4	656.711	2164.22	138.269	6561.14	3581.52	7503.41	4194.14	4513.74	2210.49	50.914	5.475	2870.91
12	9	TR3715082|c0_g7_i1	ncRNA	ncRNA	Uncultured marine bacterium MedDCM-OCT-S04-C749	NA	2252.87	7877.47	2795.34	2132.19	1374.34	1423.52	1521.88	755.745	547.296	1229.07	634.366	2049.46	3510.38	1034.79	564.979	1255.1	781.88	762.544	1487.84	585.144	371.993	1004.45	833.448	1108.41
10	10	TR3710203|c1_g11_i1	not annotated	no proteins annotated	Candidatus Thalassoarchaea	doi:10.1038/ismej.2014.249	991.939	664.377	855.818	3035.51	2450.17	1212.86	5145.18	653.11	1196.93	3699.87	1153.63	1914.49	419.801	395.001	2623.75	941.39	4695.22	505.919	1322.07	149.335	1140.88	279.206	389.047	1169.24
13	11	TR3758275|c28_g21_i2	mRNA	C-phycoerythrin class II beta chain (mpeB)	Synechococcus	NA	2640.72	4330.43	1735.42	2594.83	1500.21	815.019	1011.92	870.571	1301.53	962.945	2227.78	1817.4	724.878	341.32	938.609	359.899	859.263	479.646	291.264	232.536	1658.52	632.819	3498.56	910.665
17	12	TR3757132|c12_g18_i1	mRNA	ferredoxin-NADP reductase	Synechococcus	NA	1223.45	1247.37	2184.41	1020.97	1450.13	1192.09	1112.81	770.87	1443.89	2333.9	2790.99	1524.63	194.127	127.476	496.644	508.024	543.381	616.255	505.591	587.387	1027.24	783.932	2875.21	751.388
19	13	TR3726381|c2_g9_i1	NA	NA	NA	NA	460.007	1238.66	823.71	3388.94	3507.3	817.635	4250.98	742.982	25.891	1067.52	207.906	1502.87	1201.96	533.233	1239.98	225.793	2538.74	196.258	589.463	104.294	132.009	16.482	123.366	627.416
11	14	TR3710203|c1_g4_i1	not annotated	no proteins annotated	Candidatus Thalassoarchaea	doi:10.1038/ismej.2014.249	1482.98	710.504	163.639	883.614	606.826	450.081	4228.39	1199.54	1424.32	3076.79	1087.66	1392.21	745.19	996.532	2033.65	635.106	4125.08	371.332	1308.13	418.055	1484.34	501.63	239.435	1168.95
44	15	TR3720487|c6_g3_i1	ncRNA	Yfr103	Synechococcus	cluster 1	1251.52	1966.06	3681.56	2140.54	1178.92	155.298	1578.42	60.562	255.608	240.636	1100.19	1237.21	85.919	49.975	94.589	148.313	175.803	237.463	677.618	113.161	78.241	26.73	772.833	223.695
15	16	TR3715716|c0_g5_i1	NA	NA	NA	NA	2370.85	5567.31	686.784	1753.77	92.417	275.152	80.21	218.927	382.144	127.87	77.148	1057.51	3004.94	1709.44	2559.81	653.242	124.629	174.378	194.943	159.318	137.972	748.54	35.192	863.855
23	17	TR3315260|c0_g1_i1	ncRNA	Yfr103	Synechococcus sp. WH 8109	cluster 3	711.747	1468.72	1734.37	2172.04	1432.69	1310.41	866.427	394.789	262.784	97.181	398.117	986.298	47.285	85.213	180.207	301.005	342.639	1830.57	1214.3	361.004	75.202	117.134	381.008	448.688
25	18	TR2950890|c0_g1_i1	ncRNA	Yfr103	Synechococcus	cluster 3	944.241	1447.89	1124.04	1284.35	1079.3	375.453	964.708	215.958	359.805	553.047	2101.56	950.032	27.507	46.667	62.526	117.026	69.164	258.082	531.297	329.028	323.29	155.772	2098.99	365.396
21	19	TR3745377|c6_g8_i1	ncRNA	rnpB	Legionella, Fluoribacter, Saccharophagus	NA	2003.57	2663.13	1147.23	892.764	675.38	170.509	668.055	75.652	121.553	1105.45	869.938	944.84	1683.74	516.631	585.113	210.928	445.015	141.09	167.848	104.191	705.689	631.072	589.769	525.554
39	20	TR3720487|c6_g6_i1	ncRNA	Yfr103	Synechococcus	cluster 1	755.524	1318.2	1737.4	1960.96	1611.64	473.06	960.887	167.158	157.175	92.503	550.992	889.591	56.361	86.861	212.472	70.602	560.248	655.524	460.543	72.666	47.84	104.147	621.776	268.095
20	21	TR3756767|c13_g1_i1	mRNA	C-phycoerythrin class II beta chain (mpeB)	Synechococcus sp. WH 7803	NA	1019.92	1484.18	551.116	570.612	659.206	1575.13	456.803	1342.41	470.554	414.279	1074.04	874.386	281.526	139.579	363.683	450.844	350.965	912.356	382.537	681.073	631.131	444.19	1202.64	530.957
28	22	TR3689853|c0_g3_i1	NA	NA	NA	NA	935.941	2125.99	1480.76	1010.57	991.549	867.211	440.069	638.398	413.937	374.624	174.238	859.389	568.208	527.999	508.882	427.575	322.738	236.865	155.6	351.441	361.196	288.515	95.735	349.523
22	23	TR3567523|c0_g4_i1	mRNA	C-phycoerythrin class I subunit beta (cpeB)	Synechococcus	NA	1542.75	1225.63	421.387	518.05	568.031	714.114	566.256	686.926	424.294	1197.66	1543.94	855.367	302.044	201.525	567.937	247.975	154.045	578.02	615.783	362.161	599.58	630.112	1177.82	494.273
35	24	TR3689853|c0_g2_i1	NA	NA	NA	NA	864.426	2056.64	1389.85	1007.93	840.561	639.27	355.487	402.633	300.762	321.406	149.765	757.157	541.854	491.282	421.915	403.061	248.362	153.651	119.661	316.106	305.183	204.82	63.087	297.18
38	25	TR3689853|c0_g4_i1	NA	NA	NA	NA	834.88	1679.09	1415.49	910.297	778.463	652.901	319.929	523.511	213.644	331.385	188.13	713.429	422.956	480.226	387.229	444.582	229.183	145.614	147.572	260.222	268.865	217.592	53.704	277.977
29	26	TR3755520|c6_g3_i5	mRNA	photosystem II protein D1 1	Synechococcus	NA	785.325	456.336	439.001	958.015	194.163	454.121	268.377	808.682	1684.56	1239.92	430.731	701.749	34.642	40.615	211.291	267.366	35.03	144.766	595.878	300.912	124.251	1336.22	735.738	347.882
18	27	TR6558260|c0_g1_i1	NA	NA	NA	low complexity	136.15	44.537	43.663	62.882	332.296	4869.03	233.695	1294.53	615.49	0	0	693.843	290.65	595.034	205.065	1210.24	359.92	1612.29	1534.59	2121.79	226.389	0	3.908	741.807
71	28	TR3754889|c13_g9_i1	ncRNA	Yfr103	Synechococcus	cluster 1	758.913	1299.04	1010.75	985.428	626.82	89.881	696.016	92.63	227.324	320.385	755.287	623.861	39.871	25.782	117.729	65.375	149.448	132.717	174.222	54.348	111.22	78.345	528.982	134.367
40	29	TR3689853|c0_g1_i1	NA	NA	NA	NA	678.505	1413.91	1059.88	709.22	596.302	620.503	283.482	471.899	213.644	256.946	123.679	584.361	452.344	448.922	356.514	413.003	208.668	182.502	100.87	291.103	221.336	178.91	49.033	263.928
24	30	TR3749495|c2_g15_i1	mRNA	ribulose-5-phosphate 3-epimerase	Synechococcus	NA	365.041	405.953	355.983	387.969	455.724	182.396	277.379	201.58	269.893	1603.97	1521.31	547.927	89.862	37.487	157.52	69.275	189.329	53.417	33.659	90.901	473.809	294.89	2591.28	371.039
27	31	TR3406326|c0_g1_i1	NA	NA	NA	NA	391.197	754.92	472.769	591.042	969.108	463.271	134.751	629.298	293.581	524.261	642.006	533.291	9.076	203.498	762.088	752.988	753.172	568.189	68.473	119.918	172.747	299.021	145.979	350.468
67	32	TR3575341|c0_g4_i1	ncRNA	Yfr103	Synechococcus sp. RCC307	cluster 2	716.8	807.585	852.587	998.885	983.348	266.727	603.624	106.771	126.979	125.252	122.709	519.206	54.856	118.092	73.154	132.81	85.91	186.841	474.457	200.028	115.641	58.227	120.547	147.324
54	33	TR3491108|c0_g1_i2	tmRNA	tmRNA	Candidatus Pelagibacter ubique	NA	38.264	68.041	256.6	243.022	356.281	532.081	374.784	1603.69	644.599	880.496	533.364	502.838	24.304	17.541	79.249	37.277	65.275	88.706	220.987	219.963	512.222	376.514	333.827	179.624
37	34	TR3722207|c0_g1_i1	NA	NA	NA	NA	120.581	585.861	639.911	124.479	383.187	405.736	655.76	352.251	272.621	1085.87	773.876	490.921	133.701	99.277	60.427	202.419	255.098	165.385	303.862	191.447	632.893	453.154	686.736	289.491
34	35	TR3742308|c5_g11_i1	mRNA	Photosystem I reaction center subunit XI (psaL)	Synechococcus sp. CC9605	dicistronic	579.221	857.8	481.767	492.796	443.522	352.62	364.029	396.66	187.977	555.043	607.452	483.535	235.927	104.871	334.352	235.64	278.246	225.555	278.273	197.56	384.195	329.548	834.72	312.626
34	35	TR3742308|c5_g11_i1	mRNA	Photosystem I reaction center subunit VIII	Synechococcus sp. CC9605	dicistronic	579.221	857.8	481.767	492.796	443.522	352.62	364.029	396.66	187.977	555.043	607.452	483.535	235.927	104.871	334.352	235.64	278.246	225.555	278.273	197.56	384.195	329.548	834.72	312.626
53	36	TR3667877|c0_g2_i1	mRNA	conserved hypothetical protein	Prochlorococcus marinus	NA	846.917	805.144	2350.81	466.035	16.231	72.461	406.814	8.994	13.456	90.794	158.015	475.97	249.068	389.058	806.842	146.306	13.044	20.934	150.001	0	56.358	55.455	121.147	182.565
86	37	TR3749490|c0_g11_i1	NA	NA	NA	NA	282.724	1166.67	653.398	694.928	377.414	166.762	155.924	28.52	70.825	617.887	864.982	461.821	97.264	41.361	249.95	32.845	104.755	92.034	36.108	6.41	76.215	83.447	368.419	108.073
50	38	TR3715082|c0_g4_i1	ncRNA	ncRNA	Uncultured marine bacterium MedDCM-OCT-S04-C749	NA	278.406	1813.65	723.904	468.97	277.867	180.35	450.667	102.643	42.312	366.984	299.305	455.006	682.471	121.545	106.075	199.503	204.257	104.779	201.39	43.311	117.575	140.822	188.153	191.807
33	39	TR3739062|c3_g1_i1	ncRNA	rnpB	Acinetobacter	NA	0	0	0	0	0	15.4	232.762	586.804	1368.73	2545.83	229.897	452.675	0	0	0	0	0	0	8.42	126.625	2605.66	452.313	331.201	320.383
66	40	TR3720487|c6_g9_i1	ncRNA	Yfr103	Synechococcus sp. WH 7803	cluster 4	213.791	527.145	861.555	814.909	687.098	158.76	574.381	86.807	278.342	137.774	266.005	418.779	18.346	31.316	38.408	153.33	63.684	269.261	481.159	176.97	70.183	66.339	267.585	148.78
48	41	TR3710090|c0_g1_i1	NA	NA	NA	NA	205.144	533.215	608.236	551.995	308.48	482.409	619.639	510.283	217.11	136.642	427.731	418.262	93.793	114.423	224.639	288.618	146.521	179.892	336.492	226.178	222.28	167.034	198.757	199.875
70	42	TR3741039|c1_g9_i1	not annotated	no proteins annotated	Candidatus Thalassoarchaea	doi:10.1038/ismej.2014.249	101.449	74.026	80.239	74.411	169.419	225.153	262.735	512.057	1401.96	1235.34	439.917	416.064	51.447	58.312	58.864	47.73	145.385	109.249	246.703	187.639	197.128	247.428	140.178	135.46
32	43	TR3524199|c0_g1_i1	rRNA	28S	NA	NA	40.296	40.703	206.335	497.869	774.689	675.596	1555.38	399.761	305.854	11.529	28.469	412.408	79.391	115.061	670.982	428.829	1240.57	233.418	600.173	25.874	122.996	1.24	11.734	320.933
45	44	TR3691599|c0_g3_i2	mRNA	conserved hypothetical protein	Rhodobacteraceae bacterium HIMB11	NA	158.396	141.637	124.143	69.961	132.245	93.153	94.134	5.841	64.479	122.941	3186.49	381.22	95.723	2.972	71.914	37.779	35.03	45.957	102.09	0	53.124	82.379	1722.84	204.528
43	45	TR3748610|c8_g2_i1	mRNA	C-phycoerythrin class II beta chain (mpeB)	Synechococcus	NA	476.261	580.848	344.499	292.466	471.973	231.126	210.993	342.747	122.788	255.786	703.816	366.664	171.073	88.377	194.199	63.515	209.269	123.777	97.084	162.778	470.137	208.369	839.798	238.943
62	46	TR3759230|c17_g12_i1	mRNA	SusC/RagA family TonB-linked outer membrane protein	Lacinutrix	NA	131.648	503.053	292.825	584.923	533.787	158.139	878.441	239.92	122.788	274.593	244.298	360.401	107.286	73.146	113.28	70.571	161.703	139.252	214.614	51.154	352.597	201.379	189.405	152.217
73	47	TR3726381|c2_g2_i1	asRNA	asRNA to hypothetical protein	Oxytrichidae	NA	75.497	219.002	304.43	221.277	593.164	276.093	359.028	350.45	570.36	424.5	568.135	360.176	45.526	39.256	91.821	95.502	297.933	49.644	84.603	64.73	250.712	62.661	284.346	124.249
31	48	TR3748382|c0_g2_i1	mRNA	membrane protein	Rhodobacteraceae	NA	984.292	648.842	244.603	202.622	357.343	57.587	363.321	87.571	163.775	404.245	437.184	359.217	664.186	301.271	417.561	82.592	207.719	174.378	97.466	53.109	309.246	836.604	441.897	326.003
63	49	TR3310683|c1_g1_i1	not annotated	no proteins annotated	Candidatus Thalassoarchaea	doi:10.1038/ismej.2014.249	79.152	107.612	52.268	83.821	129.192	93.835	474.414	474.253	415.382	1797.25	164.175	351.941	56.361	46.883	62.359	35.301	350.872	57.648	115.133	202.198	391.447	238.054	101.811	150.733
89	50	TR3754889|c12_g2_i1	ncRNA	Yfr103	Picocyanobacteria	cluster 4	385	555.259	596.711	572.031	288.742	37.456	430.752	55.195	170.769	118.058	497.214	337.017	7.183	36.369	29.414	51.253	74.229	104.496	159.322	56.969	90.282	92.216	396.965	99.8816
41	51	TR3524199|c0_g2_i1	rRNA	28S	NA	NA	54.732	41.498	124.536	380.392	689.762	657.856	1156.49	345.031	149.899	14.333	24.666	330.836	20.178	112.679	541.958	343.613	1103.7	188.548	432.993	27.072	57.728	0.831	7.694	257.908
30	52	TR2708045|c0_g1_i1	mRNA	NA	NA	NA	39.52	0	0	79.226	324.047	2283.78	107.351	738.151	49.55	0	0	329.239	108.694	290.563	48.952	488.497	376.452	655.84	274.243	1207.61	339.233	0	0	344.553
26	53	TR3738670|c3_g2_i1	rRNA	23S	NA	NA	58.948	44.266	40.562	58.566	35.837	171.243	244.563	353.797	343.713	194.492	2074.02	329.091	6.637	13.39	11.916	30.148	22.988	209.275	379.302	117.041	150.151	256.748	2732.99	357.326
98	54	TR3757592|c9_g10_i1	mRNA	hypothetical protein (next + complementary to putative phosphoribulokinase/uridine kinase family protein)	Synechococcus sp. WH 8109	NA	602.171	131.761	1053.29	496.843	309.172	9.012	172.433	9.073	226.16	374.661	207.154	326.52	36.947	3.104	22.985	41.96	16.359	2.382	22.906	15.604	69.585	15.436	702.113	86.3074
88	55	TR3720487|c6_g11_i1	ncRNA	Yfr103	Synechococcus	cluster 1	277.599	502.538	672.944	642.999	582.47	145.293	335.46	51.857	78.55	51.027	233.691	324.948	17.29	24.795	64.16	24.168	205.046	243.749	153.193	45.737	32.611	22.188	268.429	100.124
52	56	TR3745377|c6_g7_i1	ncRNA	rnpB	Legionella, Fluoribacter	NA	383.306	493.728	284.501	349.267	342.298	63.544	266.455	123.882	84.019	571.473	387.886	304.578	271.164	153.98	207.761	109.436	175.777	86.683	68.113	39.41	267.15	388.174	243.862	182.865
46	57	TR3758275|c28_g21_i3	mRNA	C-phycoerythrin class II beta chain (mpeB)	Synechococcus	dicistronic	336.557	358.741	131.088	201.25	269.97	605.017	142.595	452.725	207.231	224.494	339.433	297.191	70.885	41.987	137.112	196.649	116.85	435.276	233.374	289.25	226.412	174.423	326.978	204.472
46	57	TR3758275|c28_g21_i3	mRNA	C-phycoerythrin class II alpha chain (mpeA)	Synechococcus	dicistronic	336.557	358.741	131.088	201.25	269.97	605.017	142.595	452.725	207.231	224.494	339.433	297.191	70.885	41.987	137.112	196.649	116.85	435.276	233.374	289.25	226.412	174.423	326.978	204.472
93	58	TR3735536|c6_g6_i1	ncRNA	rnpB	Prochlorococcus	NA	270.136	810.634	701.016	451.015	131.781	100.845	243.989	99.279	41.983	163.868	195.519	291.824	113.474	98.88	347.568	57.431	91.47	14.148	41.877	13.116	68.445	31.756	153.052	93.747
51	59	TR3738611|c2_g4_i4	NA	NA	NA	NA	460.814	221.322	227.603	255.539	297.397	108.933	495.037	324.197	251.474	351.435	161.927	286.88	280.13	89.303	130.277	69.076	469.099	37.399	161.093	103.69	253.786	393.535	53.063	185.496
95	60	TR3755520|c6_g4_i1	mRNA	photosystem I reaction center subunit IX, photosystem II protein D1 3, photosystem II protein D1 1	Synechococcus	NA	519.323	225.82	444.848	393.6	117.986	82.915	156.284	145.99	349.482	481.319	232.404	286.361	5.497	14.461	96.759	6.826	45.481	50.1	39.661	18.236	149.817	65.055	515.833	91.6115
94	61	TR3695927|c0_g4_i1	rRNA	28S	NA	NA	9.056	262.062	347.67	383.212	686.065	640.531	318.344	291.487	62.557	19.308	75.476	281.433	167.542	58.457	240.813	172.146	78.519	85.346	107.159	6.399	58.603	18.381	29.737	93.0093
69	62	TR3741039|c1_g1_i4	not annotated	no proteins annotated	Candidatus Thalassoarchaea	doi:10.1038/ismej.2014.249	262.52	100.775	134.722	95.954	144.333	105.817	312.41	207.351	767.806	658.035	302.614	281.122	129.806	161.595	162.542	68.846	321.99	76.472	227.265	156.963	135.992	74.256	71.056	144.253
80	63	TR3759541|c23_g4_i1	mRNA	photosystem I iron-sulfur center subunit VII (PsaC)	Synechococcus sp. CC9605	NA	390.033	635.655	237.044	311.563	348.687	59.754	178.75	107.861	34.264	383.609	331.008	274.384	85.688	99.433	141.847	60.755	85.71	62.117	77.296	63.819	178.031	89.056	317.198	114.632
87	64	TR3692062|c0_g4_i1	ncRNA	Yfr103	Prochlorococcus marinus	outgroup	715.289	536.199	294.174	961.718	13.159	250.731	105.283	80.36	0	3.76	42.151	272.984	111.933	76.815	160.371	198.499	11.962	179.196	224.254	43.198	1.381	26.794	93.68	102.553
79	65	TR3355050|c0_g1_i1	mRNA	photosystem II protein D1	Prochlorococcus	NA	123.266	694.614	392.278	553.357	119.532	117.281	213.409	157.382	99.625	105.99	318.002	263.158	26.282	65.819	283.778	40.883	80.203	41.031	66.299	96.676	182.52	39.005	339.933	114.766
61	66	TR3685771|c0_g1_i1	not annotated	no proteins annotated	Candidatus Thalassoarchaea	doi:10.1038/ismej.2014.249	41.072	84.576	201.021	159.882	315.989	251.128	728.698	211.936	467.192	296.491	120.118	261.646	29.521	8.229	102.676	137.107	811.203	127.083	197.159	89.212	66.085	38.843	72.328	152.677
55	67	TR3750116|c2_g7_i1	mRNA	unk11 (between unk12 and cpeY on complementary strand )	Synechococcus sp. CC9605	NA	308.564	356.823	260.959	137.831	224.634	308.75	190.584	347.429	379.769	63.095	297.909	261.486	60.535	35.262	126.233	87.641	148.004	355.988	241.571	154.864	388.915	135.159	164.39	172.597
85	68	TR3593844|c0_g5_i1	rRNA	28S	NA	NA	34.242	220.143	239.902	356.346	889.101	345.541	457.702	116.758	54.59	16.495	122.216	259.367	290.177	125.239	393.36	15.022	117.719	43.608	81.231	0	99.928	0	27.376	108.515
49	69	TR3724784|c2_g2_i1	NA	NA	NA	NA	180.581	532.224	69.459	257.323	689.468	148.695	158.396	208.598	66.267	79.674	402.455	253.922	23.624	206.866	208.488	6.742	124.415	60.682	33.245	84.87	1033.92	128.762	230.907	194.774
99	70	TR3749490|c0_g10_i1	NA	NA	NA	NA	165.42	551.415	535.565	367.252	229.895	116.012	68.96	33.272	45.073	356.281	316.021	253.197	46.144	27.045	131.482	30.493	55.238	20.662	21.665	0	71.001	23.181	124.17	50.0983
81	71	TR3710090|c0_g2_i1	NA	NA	NA	NA	115.834	200.905	343.352	318.152	194.571	381.685	471.188	347.28	150.944	57.581	180.373	251.079	63.35	60.189	116.333	112.123	94.678	116.23	206.003	146.396	149.483	57.968	130.47	113.929
96	72	TR2950890|c0_g1_i2	ncRNA	Yfr103	Synechococcus	cluster 3	397.139	415.764	358.842	399.594	255.313	98.479	252.542	47.887	82.622	95.12	341.355	249.514	9.173	24.843	21.971	38.688	21.798	174.335	260.298	90.195	31.84	35.068	265.895	88.5549
65	73	TR3717422|c1_g16_i1	NA	NA	NA	NA	444.387	632.653	341.822	454.573	266.472	50.422	75.074	6.201	20.994	267.269	78.961	239.893	391.542	376.594	324.786	63.807	178.53	9.004	9.311	0	190.129	69.866	28.964	149.321
68	74	TR3758275|c24_g1_i2	mRNA	C-phycoerythrin class II alpha chain (mpeA)	Synechococcus	NA	268.074	295.835	183.779	150.789	301.303	177.536	164.679	244.109	113.271	179.305	559.107	239.799	48.365	34.877	72.045	35.51	134.906	122.201	70.266	87.574	305.068	75.626	601.452	144.354
56	75	TR3758275|c28_g21_i1	mRNA	C-phycoerythrin class II beta chain (mpeB)	Synechococcus	NA	293.403	355.608	97.088	193.107	201.539	531.036	99.023	370.872	186.099	120.351	183.984	239.283	70.533	33.686	101.435	137.054	92.352	417.191	200.383	247.557	141.782	123.444	253.724	165.376
90	76	TR3741039|c1_g1_i5	not annotated	no proteins annotated	Candidatus Thalassoarchaea	doi:10.1038/ismej.2014.249	60.99	59.782	79.867	61.904	121.475	136.272	178.019	233.727	693.472	763.57	242.359	239.222	32.518	51.768	50.264	45.336	190.291	86.107	159.566	182.396	112.418	99.476	61.133	97.3885
83	77	TR3759230|c17_g5_i9	mRNA	SusC/RagA family TonB-linked outer membrane protein	Lacinutrix	NA	99.091	172.005	197.578	256.958	351.57	160.323	501.544	169.16	170.426	279.847	196.547	232.277	66.687	30.064	68.419	33.712	107.976	140.927	173.702	84.266	288.169	87.05	156.574	112.504
59	78	TR3756099|c16_g8_i1	mRNA	photosystem I core protein PsaA	Synechococcus	NA	223.031	296.012	145.632	181.875	205.293	390.862	164.623	321.887	116.966	268.522	189.969	227.697	64.782	32.892	105.634	120.496	113.429	273.948	272.377	211.362	136.142	131.135	258.079	156.389
100	79	TR3758293|c7_g1_i1	asRNA	hypothetical protein Syncc8109_1164	Synechococcus sp. WH 8109	NA	183.664	665.902	258.472	218.438	299.464	0	152.114	49.679	109.185	169.54	371.855	225.301	11.77	25.914	51.457	0	23.696	52.188	49.841	14.283	83.64	32.242	182.179	47.9282
74	80	TR3561040|c0_g1_i1	rRNA	18S	NA	NA	41.705	325.118	121.838	168.84	201.966	96.183	360.365	245.989	155.097	190.148	473.016	216.388	42.383	141.456	201.2	20.719	112.266	57.006	139.015	184.157	231.258	40.332	185.944	123.249
60	81	TR3671047|c0_g1_i1	mRNA	Hypothetical protein SynWH7803_0390 overlapping with psaA	Synechococcus sp. WH 7803	NA	303.714	369.637	224.332	262.291	233.64	180.169	171.737	139.947	134.718	164.249	66.783	204.656	131.93	113.064	418.003	168.665	210.205	133.5	67.901	78.983	176.155	148.783	61.815	155.364
92	82	TR3514485|c0_g2_i1	NA	NA	NA	NA	39.673	104.554	137.58	113.804	425.765	129.867	644.307	86.376	123.541	333.455	96.272	203.199	33.586	27.021	77.758	22.705	590.226	52.884	79.757	13.986	72.612	14.239	50.977	94.1592
84	83	TR3750937|c8_g5_i1	mRNA	glutamate-1-semialdehyde aminotransferase	Synechococcus	NA	120.632	183.939	178.062	150.309	177.401	231.04	148.855	278.426	124.39	441.988	196.722	202.888	32.251	25.998	42.487	91.875	93.983	140.264	129.693	95.836	143.083	171.489	251.8	110.796
76	84	TR3722207|c0_g6_i1	NA	NA	NA	NA	89.433	278.794	318.893	63.717	154.752	197.719	280.549	122.564	110.529	375.793	231.635	202.216	112.613	57.23	19.681	132.988	105.116	86.749	129.322	85.649	220.162	138.794	240.585	120.808
75	85	TR3759229|c6_g1_i1	mRNA	photosystem I reaction center subunit IX (PsaJ)	Synechococcus	tricistronic	195.578	273.575	143.378	164.965	167.029	278.709	129.952	248.536	178.908	224.977	215.219	201.893	47.564	29.222	64.148	86.575	67.293	212.744	167.435	149.55	127.394	122.322	262.008	121.478
75	85	TR3759229|c6_g1_i1	mRNA	photosystem I reaction center subunit III (PsaF)	Synechococcus	tricistronic	195.578	273.575	143.378	164.965	167.029	278.709	129.952	248.536	178.908	224.977	215.219	201.893	47.564	29.222	64.148	86.575	67.293	212.744	167.435	149.55	127.394	122.322	262.008	121.478
75	85	TR3759229|c6_g1_i1	mRNA	guanylate kinase	Synechococcus	tricistronic	195.578	273.575	143.378	164.965	167.029	278.709	129.952	248.536	178.908	224.977	215.219	201.893	47.564	29.222	64.148	86.575	67.293	212.744	167.435	149.55	127.394	122.322	262.008	121.478
77	86	TR3756338|c5_g8_i1	asRNA	asRNA to hypothetical protein	Ketogulonigenium (Rhodobacteraceae)	NA	116.62	563.817	213.793	168.121	385.036	65.443	185.762	63.724	53.741	207.126	171.071	199.478	121.106	122.652	145.557	7.547	165.486	38.084	31.326	39.963	447.195	64.98	110.329	117.657
91	87	TR792884|c0_g1_i1	rRNA	28S	NA	NA	663.406	150.99	45.978	928.262	254.422	23.869	31.805	21.115	55.963	2.302	1.647	198.16	179.166	3.657	22.937	130.772	63.15	72.165	7.137	295.219	48.681	127.252	120.242	97.3071
14	88	TR2679578|c0_g1_i1	rRNA	ITS rRNA	NA	NA	120.642	555.334	270.39	188.446	228.198	70.769	200.867	179.85	79.746	46.98	171.89	192.101	30.383	108.648	266.172	24.639	148.378	54.82	85.568	329.284	7102.89	1245.47	137.441	866.699
82	89	TR3758160|c9_g6_i1	mRNA	peptidyl-prolyl cis-trans isomerase	Synechococcus	NA	94.64	159.557	234.729	97.182	124.556	102.226	141.842	102.599	421.428	278.891	317.25	188.627	45.125	16.927	84.772	37.643	69.445	32.907	62.482	34.055	181.312	194.907	482.839	112.947
97	90	TR3672060|c0_g3_i1	ncRNA	SRP RNA	Metazoa	NA	2.654	70.856	92.609	1443.64	60.382	28.418	103.058	35.889	25.185	105.99	69.124	185.255	62.695	173.012	304.663	331.006	22.426	1.675	1.58	6.236	10.751	15.004	31.763	87.3465
72	91	TR3626595|c1_g2_i1	NA	NA	NA	NA	29.249	11.335	119.04	246.187	292.354	115.201	1000.28	40.228	47.018	13.451	7.38	174.702	22.751	28.573	230.722	123.569	860.653	23.022	75.737	3.952	26.142	0.874	7.775	127.615
57	92	TR5964390|c0_g1_i1	NA	NA	NA	NA	7.892	25.383	0	22.291	158.753	1188.36	29.153	304.478	164.838	0	0	172.831	62.658	62.752	30.106	246.261	107.441	336.457	168.315	549.687	192.903	5.588	2.86	160.457
64	93	TR3668693|c3_g1_i1	rRNA	28S	NA	NA	37.233	13.571	98.89	208.233	530.213	143.083	672.988	61.756	43.313	8.299	10.749	166.212	38.112	84.575	397.522	137.828	715.028	94.067	138.813	4.608	35.086	3.916	4.061	150.329
78	94	TR3759618|c24_g10_i3	mRNA	photosystem II D1 protein form I	Synechococcus	NA	194.394	200.755	99.584	121.899	151.661	319.1	87.099	274.122	66.262	115.422	194.181	165.862	37.093	33.842	64.101	72.264	94.638	200.978	99.566	164.386	147.342	91.505	277.66	116.67
58	95	TR1489880|c0_g1_i1	mRNA	NA	NA	NA	14.824	0	0	2.043	287.367	982.558	8.71	342.15	163.77	0	4.773	164.2	9.489	50.36	14.504	273.199	43.463	213.952	178.951	766.681	171.308	0	2.992	156.809
47	96	TR4033735|c0_g1_i1	NA	NA	NA	NA	22.94	5.116	9.461	11.663	77.276	1096.39	52.518	360.543	72.542	0	0	155.313	39.798	89.231	34.233	316.236	76.769	466.748	341.921	798.851	81.637	0	0	204.129
7	97	TR5869614|c0_g1_i1	NA	NA	NA	NA	0	0	14.725	0	187.726	243.194	148.54	391.425	464.145	17.331	6.762	133.986	6.795	133.48	19.216	2090.43	12721.1	8925.25	378.698	730.66	54.678	66.015	8.182	2284.96
42	98	TR3758789|c16_g12_i1	mRNA	GroES	Synechococcus sp. WH 8109	NA	9.556	32.491	4.761	5.17	9.376	26.381	8.013	30.988	81.539	83.359	27.925	29.0508	75.496	4.945	15.339	10.903	8.286	20.934	2.8	30.758	37.733	1874.69	751.96	257.623
36	99	TR2952620|c0_g2_i1	mRNA	hypothetical protein	Sulfitobacter	NA	0	0	0	0	0	0	0	0	0	9.413	0	0.855727	0	0	0	0	0	0	0	0	14.354	3174.97	4.549	290.352
16	100	TR4311431|c0_g1_i1	mRNA	conserved hypothetical protein	Rhodobacteraceae	NA	0	0	0	0	0	0	4.507	0	0	0	0	0.409727	6.115	8801.55	5.713	0	23.202	0	0	0	0	0	0	803.325
